# Supplementary material for: Influenza virus transcription and progeny production are poorly correlated in single cells
Source: eLife. 2023 Sep 7;12:RP86852. doi: 10.7554/eLife.86852 (PMC10484525; doi:10.7554/eLife.86852)
Supplement: Supplementary file 1. — These primers were used to amplify each influenza gene from the full-length single-cell RNA sequencing library. For each reaction, a segment-specific primer was paired with the ‘Read1_TruSeq’ primer, which binds to the Illumina sequencing primer found on all transcripts in the library. [file elife-86852-supp1.xlsx]

## Sheet: Sheet1
Primer name	Primer sequence
PB2_CA9_5	ATCGGAAGAGCGTCGTGTAGCGAAAGCAGGTCAATTATATTCAATATGG
PB1_CA9_5	ATCGGAAGAGCGTCGTGTAGCGAAAGCAGGCAAACCATTTG
PA_CA9_5	ATCGGAAGAGCGTCGTGTAGCGAAAGCAGGTACTGATCC
NP_CA9_5	ATCGGAAGAGCGTCGTGTAGCAAAAGCAGGGTAGATAATCACTCAATG
NA_CA9_5	ATCGGAAGAGCGTCGTGTAGCGAAAGCAGGAGTTTAAACCG
HA_CA9_5	ATCGGAAGAGCGTCGTGTAGCAAAAGCAGGGGAAAACAAAAGC
M_CA9_5	ATCGGAAGAGCGTCGTGTAGCAAAAGCAGGTAGATATTTAAAGATGAGTC
NS_CA9_5	ATCGGAAGAGCGTCGTGTAGCAAAAGCAGGGTGACAAAGAC
Read1_TrueSeq	CTACACGACGCTCTTCCGATCT
