# Supplementary material for: Influenza virus transcription and progeny production are poorly correlated in single cells
Source: eLife. 2023 Sep 7;12:RP86852. doi: 10.7554/eLife.86852 (PMC10484525; doi:10.7554/eLife.86852)
Supplement: Supplementary file 2. — These primers were used to amplify the influenza genes from circularized templates. For each gene, two reactions were performed. One set of reactions targeted templates without large deletions and bound near the middle of the open reading frame; these reactions utilized the primers with ‘mid’ in their name. The other reactions targeted all templates (with and without deletions) and bound near the ends of the open reading frame; these reactions utilized the primers with ‘end’ in their name. [file elife-86852-supp2.xlsx]

## Sheet: Sheet1
Primer name	Primer sequence
end_PB2_ca_fw	GAGAATAAAAGAACTGAGAGATCTAATGTCGC
end_PB1_ca_fw	GGATGTCAATCCGACTCTACTTTTCC
end_PA_ca_fw	ACTTTGTGCGACAATGCTTCAATCC
end_HA_ca_fw	CGATTTTGGTTGTATTATTGTACACGTTCGC
end_NP_ca_fw	CATCGAAGCCATGGCGTCC
end_NA_ca_fw	GGTAGTCGGAATAATTAGCCTAATATTGCAAATAGG
end_M_ca_fw	CTAACCGAGGTCGAAACGTACG
end_NS_CA_fw	GGACTCCAACACCATGTCAAGC
mid_PB2_ca_fw	CAGCTATTCTCAGAAAGGCAACCAGG
mid_PB1_ca_fw	GCAGAAATGCTAGCAAGCATTGACC
mid_PA_ca_fw	GCTACAGGACATTGAAAATGAAGAGAAGATCC
mid_HA_fw	GCTGGATCTGGTATTATCATTTCAGATACACC
mid_NP_fw	GAGAAAGTCGAAACCCAGGAAACG
mid_NA_fw	TGAGCTGTCCTATTGGTGAAGTTCC
mid_M_fw	GCTATTCAACTGGTGCACTTGCC
mid_NS_fw	GGGAGCAATAGTTGGAGAAATTTCACC
end_PB2_ca_rv	GCGACATTAGATCTCTCAGTTCTTTTATTCTC
end_PB1_ca_rv	GGAAAAGTAGAGTCGGATTGACATCC
end_PA_ca_rv	GGATTGAAGCATTGTCGCACAAAGT
end_HA_ca_rv	GCGAACGTGTACAATAATACAACCAAAATCG
end_NP_ca_rv	GGACGCCATGGCTTCGATG
end_NA_ca_rv	CCTATTTGCAATATTAGGCTAATTATTCCGACTACC
end_M_ca_rv	CGTACGTTTCGACCTCGGTTAG
end_NS_CA_rv	GCTTGACATGGTGTTGGAGTCC
mid_PB2_ca_rv	CCTGGTTGCCTTTCTGAGAATAGCTG
mid_PB1_ca_rv	GGTCAATGCTTGCTAGCATTTCTGC
mid_PA_ca_rv	GGATCTTCTCTTCATTTTCAATGTCCTGTAGC
mid_HA_rv	GGTGTATCTGAAATGATAATACCAGATCCAGC
mid_NP_rv	CGTTTCCTGGGTTTCGACTTTCTC
mid_NA_rv	GGAACTTCACCAATAGGACAGCTCA
mid_NS_rv	GGTGAAATTTCTCCAACTATTGCTCCC
mid_M_rv	GGCAAGTGCACCAGTTGAATAGC
