# Supplementary material for: Influenza virus transcription and progeny production are poorly correlated in single cells
Source: eLife. 2023 Sep 7;12:RP86852. doi: 10.7554/eLife.86852 (PMC10484525; doi:10.7554/eLife.86852)
Supplement: Supplementary file 3. — Binding sequences are shown in uppercase and overhangs are shown in lowercase. Primers with ‘RT’ in their name were used to reverse transcribe the HA or NA viral RNA in supernatants or infected cells. The viral barcodes were amplified from the cDNA using an HA-specific or NA-specific primer (primers with ‘PCR’ in their name) paired with a primer that binds exogenous sequence embedded in the barcoded segments (‘PCR_Universal_R’). The samples were prepared for pooling and Illumina sequencing by attaching a sample index (‘SampleIndexXX_F’) and sequencing adapters (‘Adapter_Universal_R’) in a final PCR reaction. [file elife-86852-supp3.xlsx]

## Sheet: Sheet1
Primer name	Primer sequence
RT_HA	ATGTGTTCCAACGGCTCCTTGCAATGCCGG
RT_NA	CGGATGGTCATGGCCTGATGGAGCAG
PCR_HA_F	gtgactggagttcagacgtgtgctcttccgatctATGTGTTCCAACGGCTCCTTGCAATGCCGG
PCR_NA_F	gtgactggagttcagacgtgtgctcttccgatctCGGATGGTCATGGCCTGATGGAGCAG
PCR_Universal_R	GCCTGTCCGCGGAAGCAGTGG
SampleIndexXX_F	caagcagaagacggcatacgagatXXXXXXXXGTGACTGGAGTTCAGACGTGTGCTCTTCCGATCT
Adapter_Universal_R	aatgatacggcgaccaccgagatctacacGCCTGTCCGCGGAAGCAGTGG
